# Supplementary material for: Application of bimetallic gold–platinum nanoparticles in optical fiber sensors for pesticide detection
Source: Royal Society of Chemistry journal article supplement (doi:10.1039/d6ra01129b), 2026-04-24
Supplement: d6ra01129b1.xlsx [file d6ra01129b1.xlsx]

## Sheet: Sheet2
Evaluating the ability of Au@Pt 3 to detect low Quinalphos concentrations follows the output power (W) response of optical fiber probes
Time (s)	Output power as a function of concentration
	0	0.0001	0.0005	0.001	0.005	0.01	0.05	0.1	0.5	1	5	10	50	100	500	1000	5000	10000	50000	100000
1	0.00881	0.00897	0.00901	0.00903	0.00906	0.00916	0.00918	0.00924	0.0093	0.00933	0.00937	0.00928	0.00926	0.00923	0.00925	0.00925	0.00925	0.00925	0.00926	0.00926
2	0.00881	0.00897	0.00901	0.00903	0.00906	0.00916	0.00918	0.00924	0.0093	0.00933	0.00937	0.00929	0.00926	0.00923	0.00925	0.00925	0.00925	0.00925	0.00926	0.00926
3	0.00881	0.00897	0.00901	0.00903	0.00906	0.00916	0.00918	0.00924	0.0093	0.00933	0.00937	0.00928	0.00926	0.00923	0.00925	0.00925	0.00924	0.00925	0.00926	0.00926
4	0.00881	0.00897	0.00901	0.00903	0.00906	0.00916	0.00918	0.00924	0.0093	0.00933	0.00937	0.00928	0.00925	0.00923	0.00925	0.00925	0.00925	0.00925	0.00926	0.00926
5	0.00881	0.00897	0.00901	0.00903	0.00905	0.00916	0.00918	0.00924	0.0093	0.00933	0.00937	0.00928	0.00925	0.00923	0.00925	0.00925	0.00924	0.00925	0.00925	0.00926
6	0.00881	0.00897	0.00901	0.00903	0.00906	0.00916	0.00918	0.00924	0.0093	0.00933	0.00937	0.00928	0.00925	0.00923	0.00925	0.00925	0.00924	0.00925	0.00925	0.00926
7	0.00881	0.00897	0.00901	0.00903	0.00906	0.00916	0.00918	0.00924	0.0093	0.00933	0.00937	0.00928	0.00925	0.00923	0.00925	0.00925	0.00925	0.00926	0.00925	0.00926
8	0.00881	0.00897	0.00901	0.00903	0.00906	0.00916	0.00918	0.00924	0.0093	0.00933	0.00937	0.00929	0.00925	0.00923	0.00925	0.00925	0.00924	0.00925	0.00925	0.00926
9	0.00881	0.00897	0.00901	0.00903	0.00906	0.00916	0.00918	0.00924	0.0093	0.00933	0.00937	0.00929	0.00925	0.00923	0.00925	0.00925	0.00925	0.00926	0.00925	0.00926
10	0.00881	0.00897	0.00901	0.00903	0.00906	0.00916	0.00918	0.00924	0.0093	0.00933	0.00937	0.00929	0.00925	0.00923	0.00925	0.00925	0.00925	0.00926	0.00925	0.00926
11	0.00881	0.00897	0.00901	0.00903	0.00906	0.00916	0.00918	0.00924	0.0093	0.00933	0.00937	0.00929	0.00925	0.00923	0.00925	0.00925	0.00924	0.00925	0.00925	0.00926
12	0.00881	0.00897	0.00901	0.00903	0.00906	0.00916	0.00918	0.00924	0.0093	0.00933	0.00937	0.00929	0.00925	0.00923	0.00926	0.00925	0.00924	0.00926	0.00925	0.00926
13	0.00881	0.00897	0.00901	0.00903	0.00906	0.00916	0.00918	0.00924	0.0093	0.00933	0.00937	0.00929	0.00925	0.00923	0.00925	0.00925	0.00924	0.00925	0.00925	0.00926
14	0.00881	0.00897	0.00901	0.00903	0.00906	0.00916	0.00918	0.00924	0.0093	0.00933	0.00937	0.00929	0.00925	0.00923	0.00926	0.00925	0.00924	0.00925	0.00925	0.00926
15	0.00881	0.00897	0.00901	0.00903	0.00906	0.00916	0.00918	0.00924	0.0093	0.00933	0.00937	0.00929	0.00925	0.00923	0.00926	0.00925	0.00924	0.00925	0.00925	0.00926
16	0.00881	0.00897	0.00901	0.00903	0.00906	0.00916	0.00918	0.00924	0.0093	0.00933	0.00937	0.00929	0.00925	0.00923	0.00926	0.00925	0.00924	0.00925	0.00925	0.00926
17	0.00881	0.00897	0.00901	0.00903	0.00906	0.00916	0.00918	0.00924	0.0093	0.00933	0.00937	0.00929	0.00925	0.00923	0.00926	0.00925	0.00924	0.00925	0.00925	0.00926
18	0.00881	0.00897	0.00901	0.00903	0.00906	0.00916	0.00918	0.00923	0.0093	0.00933	0.00937	0.00929	0.00925	0.00923	0.00926	0.00925	0.00924	0.00925	0.00925	0.00926
19	0.00881	0.00897	0.00901	0.00903	0.00906	0.00916	0.00918	0.00924	0.0093	0.00933	0.00937	0.00929	0.00925	0.00923	0.00926	0.00925	0.00924	0.00925	0.00925	0.00926
20	0.00881	0.00897	0.00901	0.00903	0.00906	0.00916	0.00918	0.00923	0.0093	0.00933	0.00937	0.00929	0.00925	0.00923	0.00926	0.00925	0.00924	0.00925	0.00925	0.00926
21	0.00881	0.00897	0.00901	0.00903	0.00906	0.00916	0.00918	0.00923	0.0093	0.00933	0.00937	0.00929	0.00925	0.00923	0.00926	0.00925	0.00924	0.00925	0.00925	0.00926
22	0.00881	0.00897	0.00901	0.00903	0.00906	0.00916	0.00918	0.00923	0.0093	0.00933	0.00937	0.00928	0.00925	0.00923	0.00926	0.00925	0.00924	0.00925	0.00925	0.00926
23	0.00881	0.00897	0.00901	0.00903	0.00906	0.00916	0.00918	0.00923	0.00931	0.00933	0.00937	0.00929	0.00925	0.00923	0.00926	0.00925	0.00924	0.00925	0.00925	0.00926
24	0.00881	0.00897	0.00901	0.00903	0.00906	0.00916	0.00918	0.00923	0.00931	0.00933	0.00937	0.00929	0.00925	0.00923	0.00926	0.00925	0.00924	0.00925	0.00925	0.00926
25	0.00881	0.00897	0.00901	0.00903	0.00906	0.00916	0.00918	0.00923	0.0093	0.00933	0.00937	0.00929	0.00925	0.00923	0.00926	0.00925	0.00924	0.00925	0.00925	0.00926
26	0.00881	0.00897	0.00901	0.00903	0.00906	0.00916	0.00918	0.00924	0.00931	0.00933	0.00937	0.00929	0.00925	0.00923	0.00926	0.00925	0.00924	0.00925	0.00926	0.00926
27	0.00881	0.00897	0.00901	0.00903	0.00906	0.00916	0.00918	0.00924	0.00931	0.00933	0.00937	0.00928	0.00925	0.00923	0.00926	0.00925	0.00924	0.00925	0.00925	0.00926
28	0.00881	0.00897	0.00901	0.00903	0.00906	0.00916	0.00918	0.00924	0.00931	0.00933	0.00937	0.00928	0.00925	0.00923	0.00925	0.00925	0.00924	0.00925	0.00925	0.00926
29	0.00881	0.00897	0.00901	0.00903	0.00906	0.00916	0.00918	0.00924	0.0093	0.00933	0.00937	0.00929	0.00925	0.00923	0.00926	0.00925	0.00924	0.00925	0.00925	0.00926
30	0.00881	0.00897	0.00901	0.00903	0.00906	0.00916	0.00918	0.00924	0.0093	0.00933	0.00937	0.00928	0.00925	0.00923	0.00925	0.00925	0.00924	0.00925	0.00925	0.00926
31	0.00881	0.00897	0.00901	0.00903	0.00906	0.00916	0.00918	0.00924	0.0093	0.00933	0.00937	0.00928	0.00925	0.00923	0.00925	0.00925	0.00924	0.00925	0.00925	0.00926
32	0.00881	0.00897	0.00901	0.00903	0.00906	0.00916	0.00918	0.00924	0.0093	0.00933	0.00937	0.00929	0.00925	0.00923	0.00926	0.00925	0.00924	0.00925	0.00925	0.00926
33	0.00881	0.00897	0.00901	0.00903	0.00906	0.00916	0.00918	0.00924	0.0093	0.00933	0.00937	0.00929	0.00925	0.00923	0.00926	0.00925	0.00925	0.00925	0.00925	0.00926
34	0.00881	0.00897	0.00901	0.00903	0.00906	0.00916	0.00918	0.00924	0.0093	0.00933	0.00937	0.00928	0.00925	0.00923	0.00925	0.00925	0.00925	0.00925	0.00925	0.00926
35	0.00881	0.00897	0.00901	0.00903	0.00906	0.00916	0.00918	0.00924	0.0093	0.00933	0.00937	0.00929	0.00925	0.00923	0.00925	0.00925	0.00925	0.00925	0.00925	0.00926
36	0.00881	0.00897	0.00901	0.00903	0.00906	0.00916	0.00918	0.00924	0.0093	0.00933	0.00937	0.00928	0.00925	0.00923	0.00925	0.00925	0.00925	0.00925	0.00925	0.00926
37	0.0088	0.00897	0.00901	0.00903	0.00906	0.00916	0.00918	0.00924	0.0093	0.00933	0.00937	0.00928	0.00925	0.00923	0.00925	0.00925	0.00925	0.00925	0.00925	0.00926
38	0.0088	0.00897	0.00901	0.00903	0.00906	0.00916	0.00918	0.00924	0.0093	0.00933	0.00937	0.00928	0.00925	0.00923	0.00925	0.00925	0.00925	0.00925	0.00925	0.00926
39	0.0088	0.00897	0.00901	0.00903	0.00906	0.00917	0.00918	0.00924	0.0093	0.00933	0.00937	0.00929	0.00925	0.00923	0.00925	0.00925	0.00925	0.00925	0.00925	0.00926
40	0.0088	0.00897	0.00901	0.00903	0.00906	0.00917	0.00918	0.00924	0.0093	0.00933	0.00937	0.00928	0.00925	0.00923	0.00925	0.00925	0.00925	0.00925	0.00925	0.00926
41	0.0088	0.00897	0.00901	0.00903	0.00906	0.00917	0.00918	0.00924	0.0093	0.00933	0.00937	0.00929	0.00925	0.00923	0.00925	0.00925	0.00924	0.00925	0.00925	0.00926
42	0.0088	0.00897	0.00901	0.00903	0.00906	0.00917	0.00918	0.00924	0.0093	0.00933	0.00937	0.00928	0.00925	0.00923	0.00925	0.00925	0.00924	0.00925	0.00925	0.00926
43	0.0088	0.00897	0.00901	0.00903	0.00906	0.00917	0.00918	0.00924	0.0093	0.00933	0.00937	0.00928	0.00925	0.00923	0.00925	0.00925	0.00924	0.00925	0.00925	0.00926
44	0.0088	0.00897	0.00901	0.00903	0.00906	0.00917	0.00918	0.00924	0.0093	0.00933	0.00937	0.00929	0.00925	0.00923	0.00925	0.00925	0.00924	0.00925	0.00925	0.00926
45	0.0088	0.00897	0.00901	0.00903	0.00906	0.00917	0.00918	0.00924	0.0093	0.00933	0.00937	0.00929	0.00925	0.00923	0.00925	0.00925	0.00924	0.00925	0.00925	0.00926
46	0.0088	0.00897	0.00901	0.00903	0.00906	0.00917	0.00918	0.00924	0.0093	0.00933	0.00937	0.00929	0.00925	0.00924	0.00925	0.00925	0.00924	0.00925	0.00925	0.00926
47	0.0088	0.00897	0.00901	0.00903	0.00906	0.00917	0.00918	0.00924	0.0093	0.00933	0.00937	0.00929	0.00925	0.00923	0.00925	0.00925	0.00924	0.00925	0.00925	0.00926
48	0.0088	0.00897	0.00901	0.00903	0.00906	0.00917	0.00918	0.00924	0.0093	0.00933	0.00937	0.00929	0.00925	0.00923	0.00925	0.00925	0.00924	0.00925	0.00925	0.00926
49	0.0088	0.00897	0.00901	0.00903	0.00906	0.00917	0.00918	0.00924	0.0093	0.00933	0.00937	0.00929	0.00925	0.00924	0.00925	0.00925	0.00924	0.00925	0.00925	0.00926
50	0.0088	0.00897	0.00901	0.00903	0.00906	0.00917	0.00918	0.00924	0.0093	0.00933	0.00937	0.00929	0.00925	0.00923	0.00925	0.00925	0.00924	0.00925	0.00926	0.00926
51	0.0088	0.00897	0.00901	0.00903	0.00906	0.00917	0.00918	0.00924	0.0093	0.00933	0.00937	0.00929	0.00925	0.00923	0.00925	0.00925	0.00924	0.00925	0.00925	0.00926
52	0.0088	0.00897	0.00901	0.00903	0.00906	0.00917	0.00918	0.00924	0.0093	0.00933	0.00937	0.00929	0.00925	0.00923	0.00925	0.00925	0.00924	0.00925	0.00925	0.00926
53	0.0088	0.00897	0.00901	0.00903	0.00906	0.00917	0.00918	0.00924	0.0093	0.00933	0.00937	0.00929	0.00925	0.00924	0.00925	0.00925	0.00924	0.00925	0.00925	0.00926
54	0.0088	0.00897	0.00901	0.00903	0.00906	0.00917	0.00918	0.00924	0.0093	0.00933	0.00937	0.00929	0.00924	0.00924	0.00925	0.00925	0.00924	0.00925	0.00925	0.00926
55	0.0088	0.00897	0.00901	0.00903	0.00906	0.00916	0.00918	0.00924	0.0093	0.00933	0.00937	0.00929	0.00924	0.00924	0.00925	0.00925	0.00924	0.00925	0.00925	0.00926
56	0.0088	0.00897	0.00901	0.00903	0.00906	0.00916	0.00918	0.00924	0.0093	0.00933	0.00937	0.00929	0.00925	0.00924	0.00925	0.00925	0.00925	0.00925	0.00925	0.00926
57	0.0088	0.00897	0.00901	0.00903	0.00906	0.00916	0.00918	0.00924	0.0093	0.00933	0.00937	0.00929	0.00925	0.00924	0.00925	0.00925	0.00925	0.00925	0.00925	0.00926
58	0.0088	0.00897	0.00901	0.00903	0.00906	0.00916	0.00918	0.00924	0.0093	0.00933	0.00937	0.00929	0.00925	0.00924	0.00926	0.00925	0.00925	0.00925	0.00926	0.00926
59	0.00879	0.00897	0.00901	0.00903	0.00906	0.00916	0.00918	0.00924	0.0093	0.00933	0.00937	0.00929	0.00925	0.00924	0.00925	0.00925	0.00925	0.00925	0.00926	0.00926
60	0.0088	0.00897	0.00901	0.00902	0.00906	0.00916	0.00918	0.00924	0.0093	0.00933	0.00937	0.00929	0.00925	0.00924	0.00926	0.00925	0.00925	0.00925	0.00926	0.00926

## Sheet: Thiram
Evaluating the thiram detection capability of the Au@Pt 3 fiber optic sensor at various measured concentrations.
10-6 M	10-9 M	10-10 M
0.000407318	0.000413145	0.00041629
0.00040811	0.000412423	0.000415025
0.000408123	0.000412478	0.0004155
0.00040809	0.000412653	0.000415455
0.000408163	0.000412553	0.00041474
0.000408013	0.000412805	0.000414628
0.000409053	0.00041259	0.00041392
0.000409133	0.000412253	0.000415543
0.000408278	0.00041304	0.000414775
0.000408408	0.000412745	0.000415293
0.000408645	0.000412408	0.000415033
0.000406768	0.000412758	0.00041521
0.000406945	0.000412753	0.000414955
0.00040789	0.000412615	0.000414738
0.00040771	0.000412928	0.00041356
0.00040768	0.000412888	0.000414633
0.000407633	0.00041287	0.000415785
0.00040746	0.000412745	0.000415108
0.0004077	0.000413038	0.000414305
0.000407538	0.000412645	0.000415255
0.000407335	0.000412028	0.000413785
0.000407408	0.000411498	0.0004135
0.000407645	0.000412333	0.000413548
0.000407495	0.000411685	0.000414238
0.000407408	0.000412065	0.00041375
0.000407545	0.000412158	0.0004156
0.000407705	0.000411788	0.000412455
0.000407525	0.0004115	0.000413833
0.00040772	0.000412668	0.0004146
0.00040739	0.000411883	0.000412368
0.000407448	0.000412335	0.000413885
0.000407153	0.000413008	0.000414555
0.000407348	0.000412798	0.000413213
0.000407305	0.000412765	0.000415388
0.00040731	0.000412955	0.000416375
0.000407088	0.000411978	0.000415683
0.000407163	0.000411325	0.000414228
0.000407045	0.000412868	0.000413615
0.000407123	0.00041321	0.000414483
0.000407085	0.000413135	0.000415118
0.000406848	0.00041309	0.00041343
0.000407043	0.00041297	0.000413778
0.000406935	0.00041305	0.000413418
0.000407205	0.00041276	0.000413633
0.000407085	0.000412633	0.000413815
0.000407178	0.000412425	0.000414858
0.000407168	0.000411175	0.000415098
0.000407163	0.000411975	0.00041355
0.000407158	0.00041259	0.000414228
0.000407098	0.000412715	0.000414835
0.00040704	0.000412325	0.000412223
0.00040689	0.000412598	0.000412445
0.00040687	0.000412743
0.000407175	0.000414848
0.000407083	0.000411698
0.000407125	0.000412473
0.00040713
0.000407225
0.000407185
0.000407258
0.000407083
