# Supplementary material for: Application of bimetallic gold–platinum nanoparticles in optical fiber sensors for pesticide detection
Source: Royal Society of Chemistry journal article supplement (doi:10.1039/d6ra01129b), 2026-04-24
Supplement: d6ra01129b2.pdf [file d6ra01129b2.pdf]

## Support Information

### Application of Bimetallic gold-platinum nanoparticles in optical fiber sensors for pesticide detection

Nguyen Tran Truc Phuong,<sup>ab</sup> Nguyen Do Quynh Nhu,<sup>cde</sup> Le Hong Tho,<sup>de</sup> Do Thao Anh,<sup>de</sup> Quan-Doan Mai,<sup>f</sup> Vu Thi Huong,<sup>g</sup> Ting-Yu Liu,<sup>hi</sup> Khanh Q.Kieu,<sup>j</sup> Duc Anh Dinh,<sup>ab</sup> and Nhu Hoa Thi Tran<sup>\*cd</sup>

- 
- <sup>a.</sup> *Center for Hi-Tech Development, Nguyen Tat Thanh University, Saigon Hi-Tech Park, Ho Chi Minh City, Vietnam.*
- <sup>b.</sup> *NTT Hi-Tech Institute, Nguyen Tat Thanh University, Ho Chi Minh City, Vietnam.*
- <sup>c.</sup> *Faculty of Materials Science and Technology, University of Science, Ho Chi Minh City, 700000, Vietnam.*
- <sup>d.</sup> *Viet Nam National University, Ho Chi Minh City, Viet Nam.*
- <sup>e.</sup> *Advanced Materials Technology Institute Viet Nam National University Ho Chi Minh City, Ho Chi Minh City, 700000, Viet Nam.*
- <sup>f.</sup> *Phenikaa University Nano Institute (PHENA), Phenikaa University, Hanoi, 12116, Viet Nam.*
- <sup>g.</sup> *Department of Chemistry, Soongsil University, Seoul, 06978, Republic of Korea.*
- <sup>h.</sup> *Department of Materials Engineering, Ming Chi University of Technology, New Taipei City 243303, Taiwan.*
- <sup>i.</sup> *Department of Chemical Engineering and Materials Science, Yuan Ze University, Taoyuan City 32003, Taiwan.*
- <sup>j.</sup> *University of Arizona, Wyant College of Optical Sciences, 1630 E. University Blvd., Tucson, AZ 85719, USA.*
- † Nguyen Tran Truc Phuong and Nguyen Do Quynh Nhu had equal contribution as co-first authors.

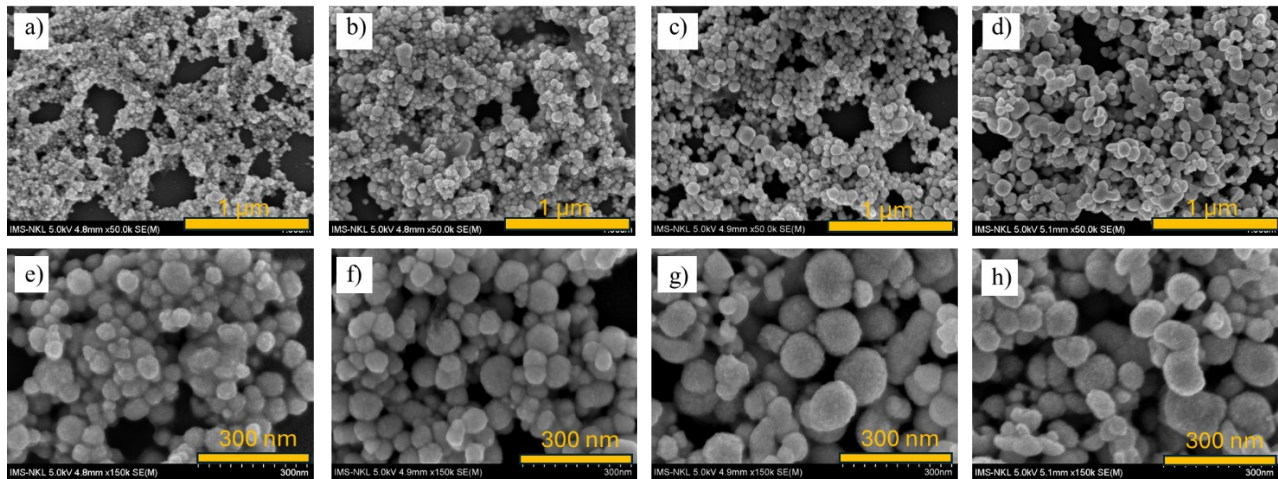

**Figure S1.** FESEM images of a,e) Au@Pt 1; b, f) Au@Pt 2; c, g) Au@Pt 3; and d, h) Au@Pt 4.

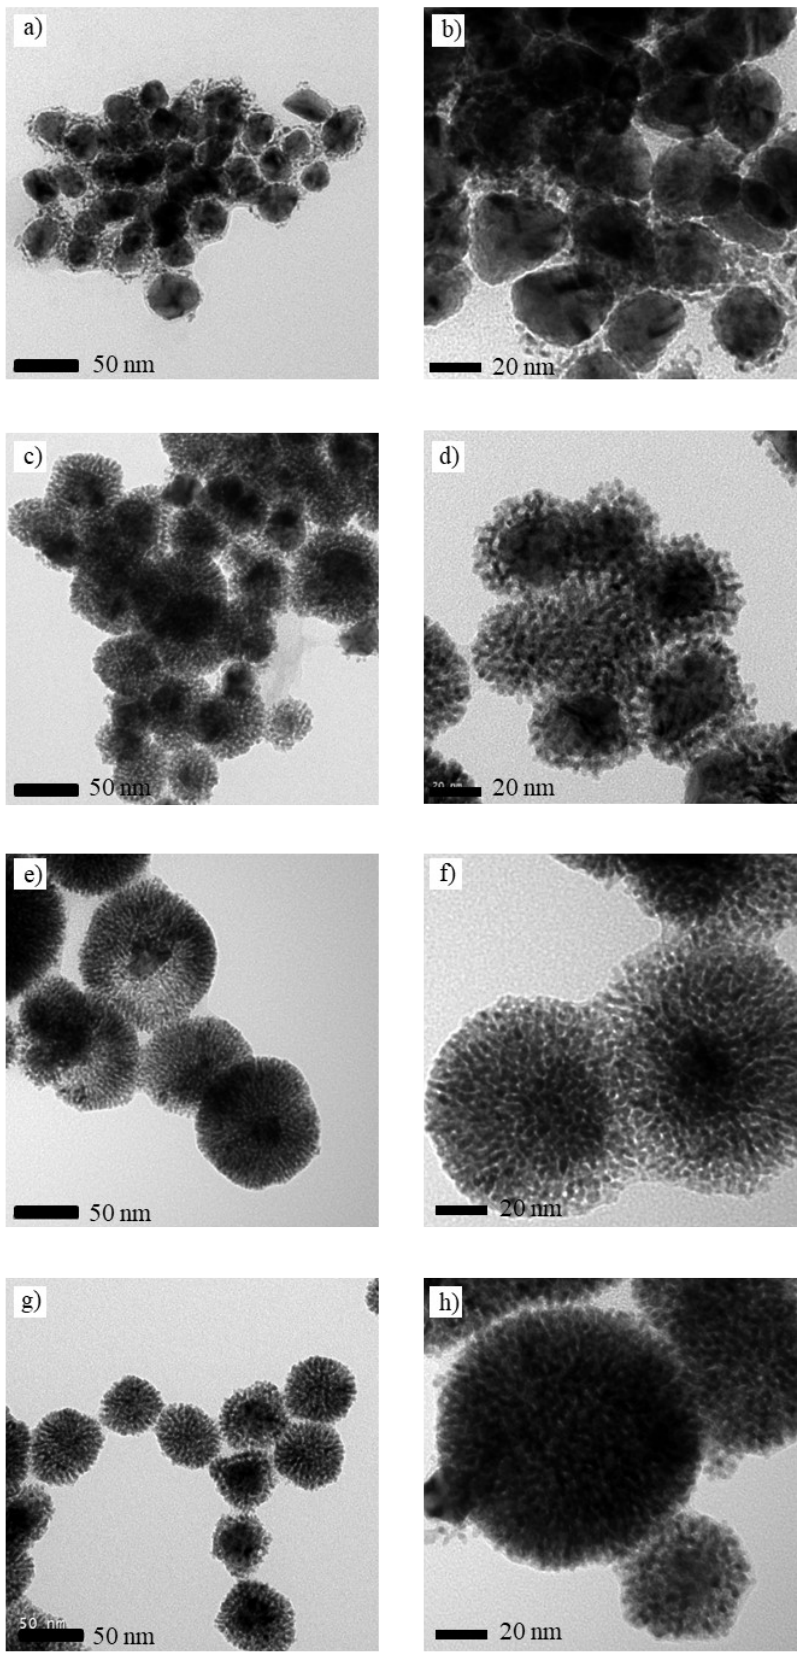

**Figure S2.** HRTEM images of a,b) Au@Pt 1; c, d) Au@Pt 2; e, f) Au@Pt 3; and g, h) Au@Pt 4.
